# Supplementary material for: Dietary Selenium Intakes and Musculoskeletal Function in Very Old Adults: Analysis of the Newcastle 85+ Study
Source: PubMed Central journal article supplement (PMC7400825; doi:10.3390/nu12072068), 2020-07-12
Supplement: nutrients-12-02068-s001.pdf [file nutrients-12-02068-s001.pdf]

Table S1: Hand grip strength (kg) and timed-up-and-go (log<sub>10</sub>-s) trajectory estimates in low, moderate and optimal selenium over 5 years separated by sex.

| Outcome                                              | Variable                 | Model 1       |               | Model 2        |               | Model 3        |          |
|------------------------------------------------------|--------------------------|---------------|---------------|----------------|---------------|----------------|----------|
|                                                      |                          | $\beta$ (SE)  | <i>p</i>      | $\beta$ (SE)   | <i>p</i>      | $\beta$ (SE)   | <i>p</i> |
| HGS (kg)<br><br>ALL<br>INDIVIDUALS                   | Intercept                | 20.06 (0.69)  | < 0.001       | 20.05 (0.78)   | < 0.001       | 25.36 (33.11)  | 0.444    |
|                                                      | Se intake group          |               |               |                |               |                |          |
|                                                      | Low Se                   | -2.70 (0.76)  | < 0.001       | -2.94 (0.88)   | 0.001         | -0.69 (0.65)   | 0.292    |
|                                                      | Moderate Se              | 0.87 (0.81)   | 0.279         | 1.27 (0.70)    | 0.175         | 0.14 (0.64)    | 0.829    |
|                                                      | Decline                  |               |               |                |               |                |          |
|                                                      | Time                     | -1.25 (0.07)  | < 0.001       | -1.25 (0.17)   | < 0.001       | -1.31 (0.17)   | < 0.001  |
|                                                      | Slopes (rate of decline) |               |               |                |               |                |          |
|                                                      | Se intake × Time         |               |               |                |               |                |          |
|                                                      | Low Se × Time            |               |               | 0.11 (0.17)    | 0.563         | 0.09 (0.20)    | 0.650    |
| Moderate Se                                          |                          |               | -0.18 (0.21)  | 0.383          | -0.18 (0.21)  | 0.387          |          |
| HGS (kg)<br><br>MEN                                  | Intercept                | 26.92 (0.96)  | < 0.001       | 26.74 (1.05)   | < 0.001       | 125.81 (59.65) | 0.036    |
|                                                      | Se intake group          |               |               |                |               |                |          |
|                                                      | Low Se                   | -1.18 (1.13)  | 0.296         | -0.88 (1.27)   | 0.488         | 1.19 (1.19)    | 0.317    |
|                                                      | Moderate Se              | -0.34 (1.09)  | 0.758         | -0.19 (1.23)   | 0.876         | 0.94 (1.07)    | 0.384    |
|                                                      | Decline                  |               |               |                |               |                |          |
|                                                      | Time                     | -1.76 (0.13)  | < 0.001       | -1.64 (0.31)   | < 0.001       | -1.69 (0.31)   | < 0.001  |
|                                                      | Slopes (rate of decline) |               |               |                |               |                |          |
|                                                      | Se intake × Time         |               |               |                |               |                |          |
|                                                      | Low Se × Time            |               |               | -0.19 (0.38)   | 0.613         | -0.25 (0.39)   | 0.513    |
| Moderate Se                                          |                          |               | -0.09 (0.37)  | 0.799          | -0.16 (0.37)  | 0.669          |          |
| HGS (kg)<br><br>WOMEN                                | Intercept                | 14.65 (0.54)  | < 0.001       | 14.71 (0.65)   | < 0.001       | -23.82 (34.80) | 0.045    |
|                                                      | Se intake group          |               |               |                |               |                |          |
|                                                      | Low Se                   | -0.72 (0.58)  | 0.215         | -0.92 (0.18)   | 0.199         | -0.91 (0.69)   | 0.184    |
|                                                      | Moderate Se              | 0.28 (0.65)   | 0.666         | 0.51 (0.80)    | 0.528         | -0.08 (0.73)   | 0.915    |
|                                                      | Decline                  |               |               |                |               |                |          |
|                                                      | Time                     | -0.92 (0.07)  | < 0.001       | -0.95 (0.18)   | < 0.001       | -1.05 (0.18)   | < 0.001  |
|                                                      | Slopes (rate of decline) |               |               |                |               |                |          |
|                                                      | Se intake × Time         |               |               |                |               |                |          |
|                                                      | Low Se × Time            |               |               | 0.10 (0.20)    | 0.617         | 0.10 (0.21)    | 0.626    |
| Moderate Se                                          |                          |               | -0.11 (0.23)  | 0.621          | -0.05 (0.23)  | 0.826          |          |
| TUG (log <sub>10</sub> -s)<br><br>ALL<br>INDIVIDUALS | Intercept                | 1.13 (0.022)  | < 0.001       | 1.13 (0.025)   | < 0.001       | 1.65 (1.08)    | 0.126    |
|                                                      | Se intake group          |               |               |                |               |                |          |
|                                                      | Low Se                   | 0.049 (0.025) | 0.048         | 0.037 (0.028)  | 0.189         | -0.002 (0.024) | 0.364    |
|                                                      | Moderate Se              | 0.003 (0.026) | 0.917         | -0.004 (0.030) | 0.884         | -0.009 (0.024) | 0.722    |
|                                                      | Decline                  |               |               |                |               |                |          |
|                                                      | Time                     | 0.054 (0.003) | < 0.001       | 0.049 (0.008)  | < 0.001       | 0.051 (0.010)  | < 0.001  |
|                                                      | Slopes (rate of decline) |               |               |                |               |                |          |
|                                                      | Se intake × Time         |               |               |                |               |                |          |
|                                                      | Low Se × Time            |               |               | 0.008 (0.009)  | 0.383         | 0.020 (0.012)  | 0.091    |
| Moderate Se                                          |                          |               | 0.005 (0.010) | 0.623          | 0.013 (0.013) | 0.301          |          |
| TUG (log <sub>10</sub> -s)<br><br>MEN                | Intercept                | 1.067 (0.030) | < 0.001       | 1.070 (0.033)  | < 0.001       | -2.949 (3.239) | 0.365    |
|                                                      | Se intake group          |               |               |                |               |                |          |
|                                                      | Low Se                   | 0.028 (0.036) | 0.425         | 0.017 (0.041)  | 0.667         | -0.016 (0.045) | 0.730    |
|                                                      | Moderate Se              | 0.035 (0.035) | 0.316         | 0.037 (0.040)  | 0.351         | 0.031(0.041)   | 0.457    |
|                                                      | Decline                  |               |               |                |               |                |          |
| Time                                                 | 0.058 (0.005)            | < 0.001       | 0.056 (0.013) | < 0.001        | 0.054 (0.013) | < 0.001        |          |

|                            |                          |                |         |                |         |                |         |
|----------------------------|--------------------------|----------------|---------|----------------|---------|----------------|---------|
|                            | Slopes (rate of decline) |                |         |                |         |                |         |
|                            | Se intake × Time         |                |         |                |         |                |         |
|                            | Low Se × Time            |                |         | 0.008 (0.015)  | 0.604   | 0.002 (0.016)  | 0.917   |
|                            | Moderate Se              |                |         | -0.001 (0.015) | 0.921   | -0.010 (0.015) | 0.507   |
| TUG (log <sub>10</sub> -s) | Intercept                | 1.174 (0.031)  | < 0.001 | 1.190 (0.035)  | < 0.001 | 0.629 (2.305)  | 0.785   |
|                            | Se intake group          |                |         |                |         |                |         |
|                            | Low Se                   | 0.032 (0.033)  | 0.334   | 0.015 (0.038)  | 0.695   | -0.023 (0.037) | 0.541   |
|                            | Moderate Se              | -0.017 (0.037) | 0.655   | -0.034 (0.043) | 0.431   | -0.029 (0.039) | 0.462   |
|                            | Decline                  |                |         |                |         |                |         |
|                            | Time                     | 0.052 (0.004)  | < 0.001 | 0.043 (0.011)  | < 0.001 | 0.042 (0.010)  | < 0.001 |
| WOMEN                      | Slopes (rate of decline) |                |         |                |         |                |         |
|                            | Se intake × Time         |                |         |                |         |                |         |
|                            | Low Se × Time            |                |         | 0.011 (0.012)  | 0.358   | 0.006 (0.011)  | 0.577   |
|                            | Moderate Se              |                |         | 0.010 (0.013)  | 0.418   | 0.003(0.012)   | 0.801   |

SE, standard error, Selenium intakes were divided by below LRNI (< 40µg/d) and moderate intakes (41-59, 41-74 µg/d in females and males, respectively). Adequate selenium intakes were used a reference.

Model 1 includes linear trend of time and selenium intakes. Model 2 includes time interaction terms.

Model 3 is adjusted for presence of hand arthritis or use of walking aids, age at baseline, sex, National Statistics Socio-Economic Classification (NS-SEC), self-rated health, energy intake, protein intake, medication use, body mass index (BMI), fat-free mass (FFM), physical activity, cognitive impairment, disability score, misreporters, change in diet. Estimated β coefficients (SE) using HGS and TUG longitudinal data.
